# Supplementary material for: A facile and scalable approach to develop electrochemical unzipping of multi-walled carbon nanotubes to graphene nanoribbons
Source: Royal Society of Chemistry journal article supplement (doi:10.1039/d0ta03782f), 2020-01-01
Supplement: d0ta03782f1.pdf [file d0ta03782f1.pdf]

## Supplementary Information

### Facile and Scalable Approach to Develop Electrochemical Unzipping of Multi-walled Carbon Nanotubes to Graphene Nanoribbons

Dongjin Ko<sup>a‡</sup>, Juhyung Choi<sup>a‡</sup>, Bingyi Yan<sup>a</sup>, Taejin Hwang<sup>a</sup>, Xuanzhen Jin<sup>b</sup>, Jong Min Kim<sup>a</sup>,  
and Yuanzhe Piao<sup>ac\*</sup>

<sup>a</sup> Department of Transdisciplinary Studies, Graduate School of Convergence Science and Technology, Seoul National University, 145 Gwanggyo-ro, Yeongtong-gu, Suwon-si, Gyeonggi-do 16229, Republic of Korea.

<sup>b</sup> Department of Polymer Materials and Engineering, Yanbian University, Yanji 133002, Jilin, P.R. China.

<sup>c</sup> Advanced Institutes of Convergence Technology, 145 Gwanggyo-ro, Yeongtong-gu, Suwon-si, Gyeonggi-do 16229, Republic of Korea.

‡ These authors contributed equally to this work.

## List of Contents

### **1. Electrochemical synthesis at different condition in concentric sulfuric acid (18 M)**

- S1.** Schematic explanation of a home-made zig set up.
- S2.** Electrochemical measurements of MWCNT at different mass loading in 18 M H<sub>2</sub>SO<sub>4</sub>.
- S3.** Electrochemical reactions of smaller diameter MWCNT were performed at 0.5 M and 18 M H<sub>2</sub>SO<sub>4</sub>.
- S4.** TEM images of GNRs: a-c) GNR-2.5H, d-f) GNR-4H, and g-i) GNR-7H, respectively.
- S5.** Material characterization of the unzipped MWCNT (denote as unzipped MWCNT-*i*).
- S6.** Cyclic voltammetry (CV) curves of MWCNTs and the obtained products at scan rate of 10 mV s<sup>-1</sup>.
- S7.** High resolution XPS for C1s spectra of the as-prepared concentrated sulfuric acid products.
- S8.** Cell potential (V) versus Time (h) and Coulomb/mass loading.

### **2. Electrochemical reactions at different concentration of sulfuric acid**

- S9.** Linear sweep voltammetry (LSV) curves of dilute H<sub>2</sub>SO<sub>4</sub> electrolytes in the three-electrode cell at a scan rate of 0.5 mV s<sup>-1</sup>.
- S10.** TEM images of the as-prepared products with caps; (a, d) 0.5 M O<sub>x</sub>-MWNCT-7H, (b, e) 10 M O<sub>x</sub>-MWNCT-7H, and (c, f) 15 M GNR-7H.
- S11.** Material characterization of the products obtained by electrochemical reactions at different concentrations of H<sub>2</sub>SO<sub>4</sub>.

### **3. Electrochemical applications of GNR-2.5H for hydrogen evolution reaction (HER)**

- S12.** Brunauer–Emmett–Teller (BET) surface areas of MWCNT and GNR-2.5H.
- S13.** SEM images of the electrochemically exfoliated graphene (EEG); (a) Low and (b) High magnification.
- S14.** SEM images of (a) MoS<sub>2</sub>, (b) MoS<sub>2</sub>/EEG, (c) MoS<sub>2</sub>/MWCNT, and (d) MoS<sub>2</sub>/GNR-2.5H.
- S15.** TGA curves of MoS<sub>2</sub> and MoS<sub>2</sub>/GNR-2.5H in air.
- S16.** Cyclic voltammograms (CV) of (a) MoS<sub>2</sub>/GNR-2.5H, (b) MoS<sub>2</sub>/MWCNT, and (c) MoS<sub>2</sub>/EEG recorded at scan rates of 20 to 80 mV s<sup>-1</sup>.
- S17.** Two CPE (constant phase element) equivalent circuit elements for the as-prepared catalysts.

**Table S1.** Comparison of electrochemical synthesis for unzipping the single or multi-walled carbon nanotube.

**Table S2.** The concentration of Fe element is determined by ICP-MS measurement.

**Table S3.** The full width at half maximum (FWHM) of the obtained products.

**Table S4.** The sheet resistance of the films was investigated by a four-point probe measurement.

**Table S5.** Comparison of reported experimental method with our electrochemical intercalation synthesis.

## Electrochemical measurements

### *Measurements of hydrogen evolution reaction (HER);*

The electrochemical performance was investigated using an electrochemical workstation (Metrohm Autolab workstation, PGSTAT 302N) in a standard three-electrode system. The glassy carbon rotating disk electrode (RDE) modified with samples, graphite rod, and Ag/AgCl (sat. KCl) was used as the working electrode, counter electrode, and reference electrode, respectively. The rotation speed of RDE was 2400 rpm. 5 mg of the sample for testing was dispersed in a mixture of deionized water (950  $\mu\text{L}$ ), followed by the addition of 5 wt% Nafion (50  $\mu\text{L}$ , Aldrich). A homogeneous slurry was obtained by sonicating for 30 min. The dispersion (10  $\mu\text{L}$ ) was drop-casted on a glassy carbon electrode (GCE) and then dried using an infrared lamp. The mass loading of catalysts was 0.21 mg  $\text{cm}^{-2}$ . All measurements were calculated respect to reversible hydrogen electrode according to the Nernst equation S1:  $E (V \text{ vs RHE}) = E (V \text{ vs Ag/AgCl}) + 0.197 + 0.0591 \times pH$ . The linear scan voltammetry (LSV) curve was measured at a scan rate of 2 mV  $\text{s}^{-1}$  in 0.5 M  $\text{H}_2\text{SO}_4$ . Double-layer capacitance was evaluated under a potential window of 0.2 to 0.3 V (vs. RHE) with various scan rates from 20 mV  $\text{s}^{-1}$  to 80 mV  $\text{s}^{-1}$  using CV in 0.5 M  $\text{H}_2\text{SO}_4$ . All LSV data were corrected with iR losses during the measurements.

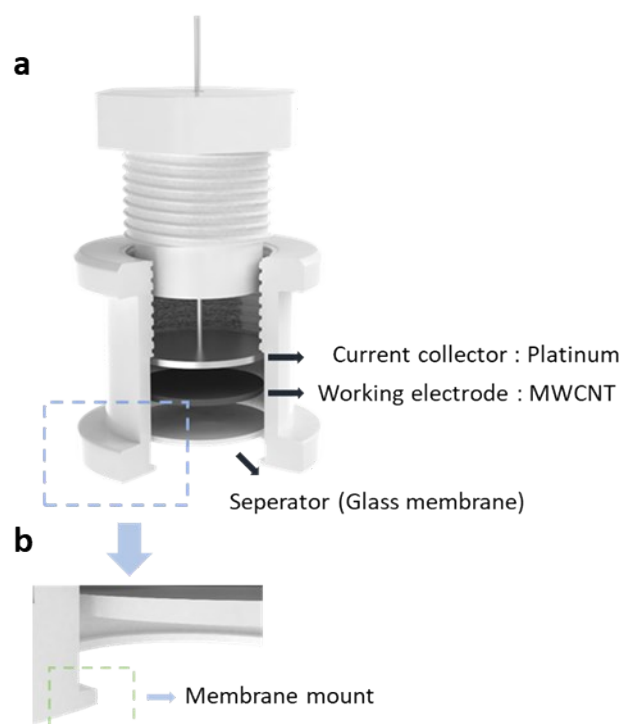

**Figure S1.** (a) The electrochemical apparatus consists of a cap (screw design), body, current collector (home-made platinum), working electrode (MWCNTs), and separator (glass fiber filter membrane was cut to fit the inside diameter (size: 20 mm) of the reactor). (b) Magnified view of the membrane mount used to support all parts of the reactor. In this design, the apparatus is made of PTFE because it shows excellent acid resistance in concentrated sulfuric acid.

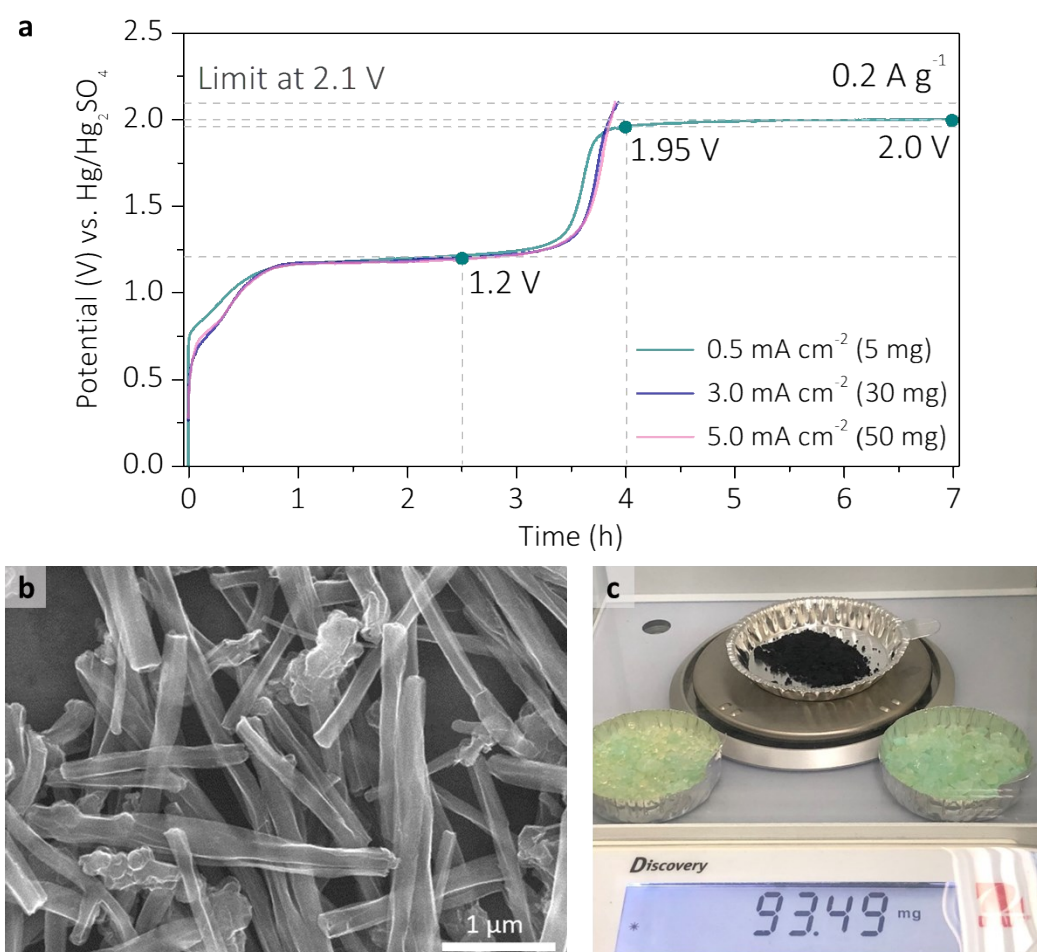

**Figure S2.** Electrochemical measurements of MWCNT in 18 M H<sub>2</sub>SO<sub>4</sub>. (a) Galvanostatic charging curve of MWCNT with a current density of 0.2 A g<sup>-1</sup> in 18 M H<sub>2</sub>SO<sub>4</sub> electrolyte at different mass loading. (b) SEM images obtained after electrochemical reaction for 2.5 hours and (c) Milligram-scale synthesis of GNR-2.5H was done in the laboratory.

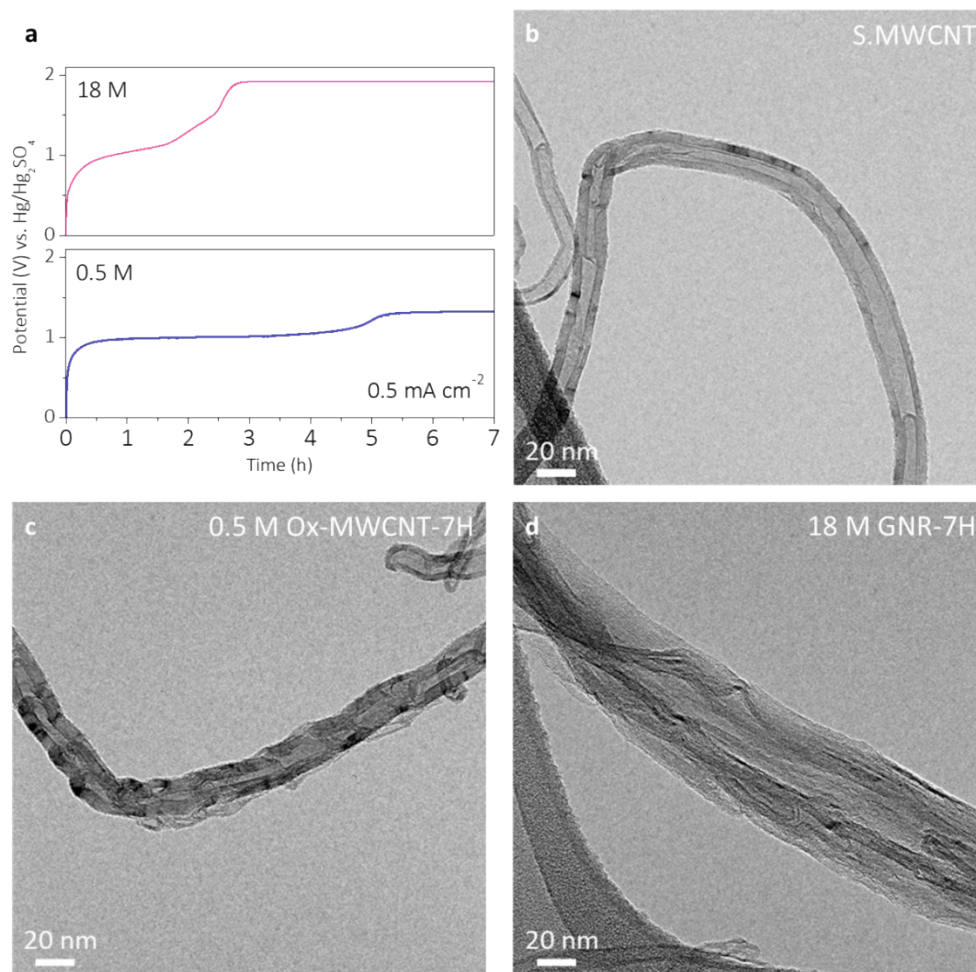

**Figure S3.** To confirm the synthesis of GNR with smaller diameter MWCNT, electrochemical reactions were performed at 0.5 M and 18 M H<sub>2</sub>SO<sub>4</sub> electrolytes respectively. (a) Galvanostatic charge curve at current density of 0.5 mA cm<sup>-2</sup>, (b) TEM images of pristine S-MWCNT, (c) surface oxidation of S-MWCNT performed in 0.5 M H<sub>2</sub>SO<sub>4</sub> electrolyte, and (d) partially unzipped GNR performed in 18 M H<sub>2</sub>SO<sub>4</sub> electrolyte.

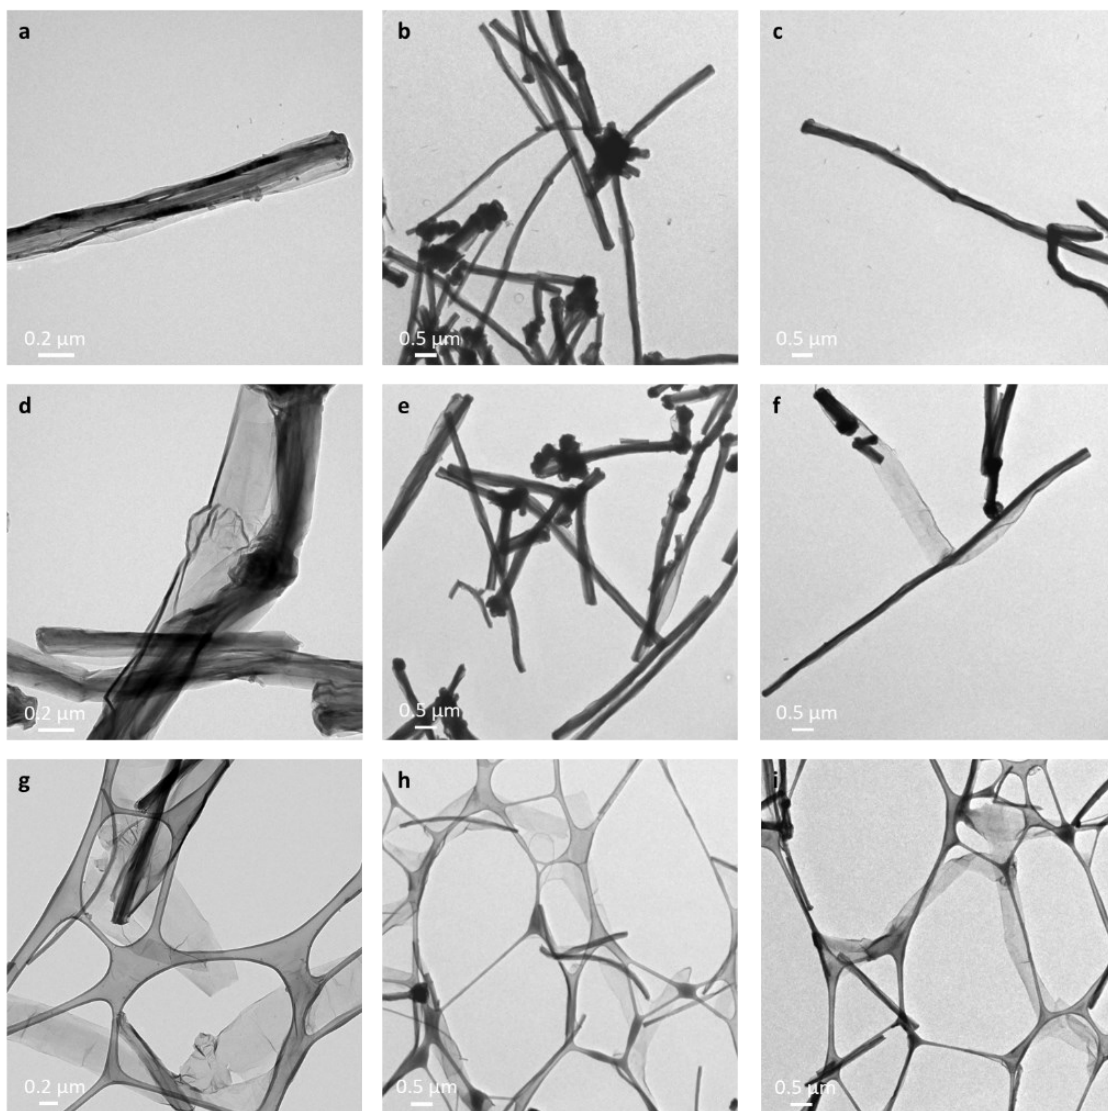

**Figure S4.** TEM images of GNRs: a-c) GNR-2.5H, d-f) GNR-4H, and g-i) GNR-7H, respectively.

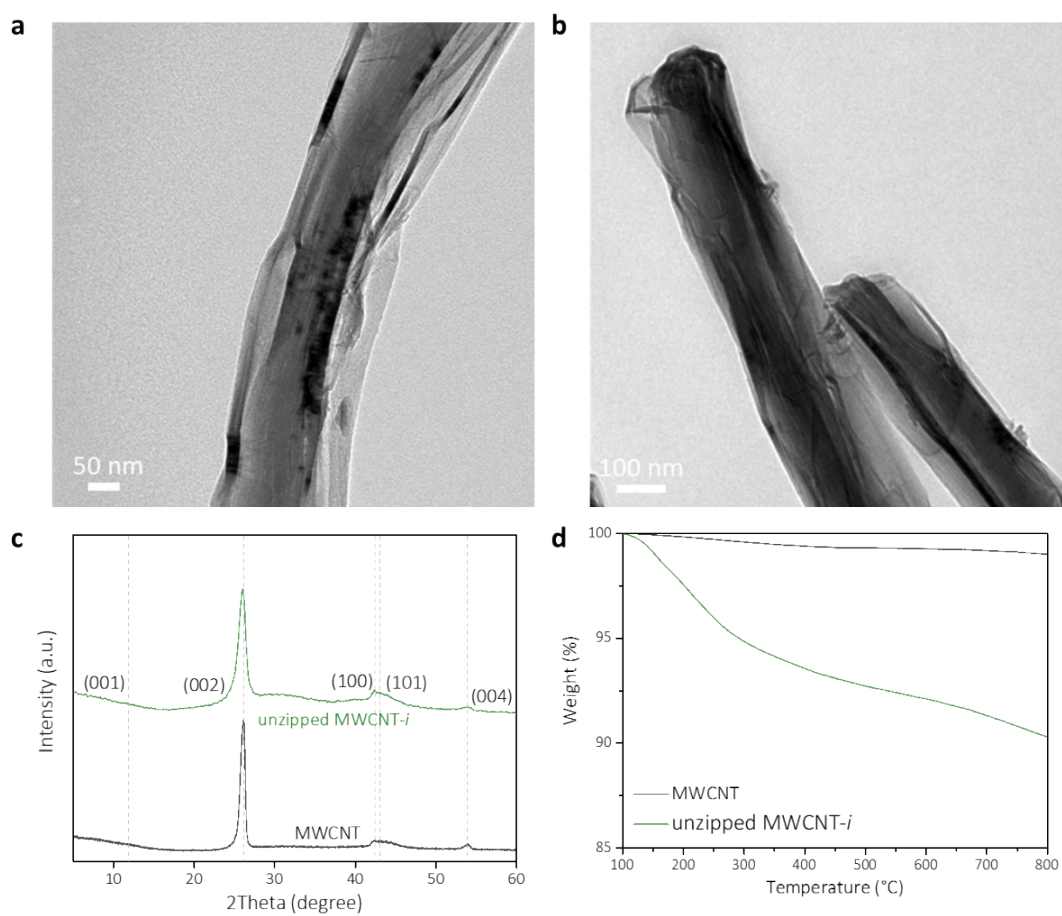

**Figure S5.** Material characterizations of the unzipped MWCNT (denote as unzipped MWCNT-*i*). (a, b) TEM images, (c) XRD patterns, and (d) TGA curves. The weight loss of unzipped MWCNT-*i* observed at 800 °C is approximately 9.7 wt%.



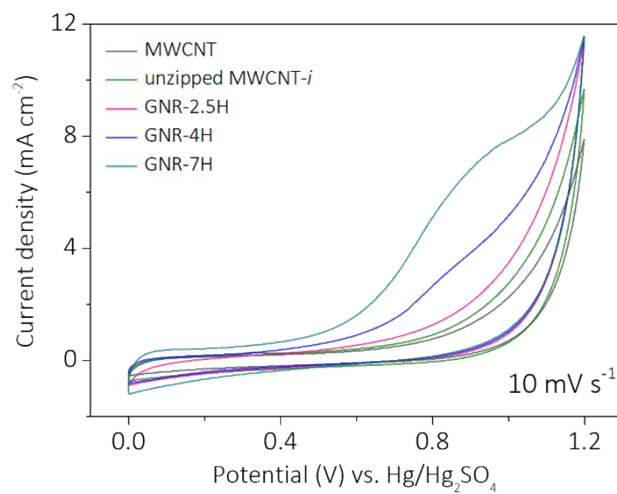

**Figure S6.** Cyclic voltammetry (CV) curves of MWCNTs and the obtained products at scan rate of  $10 \text{ mV s}^{-1}$ .

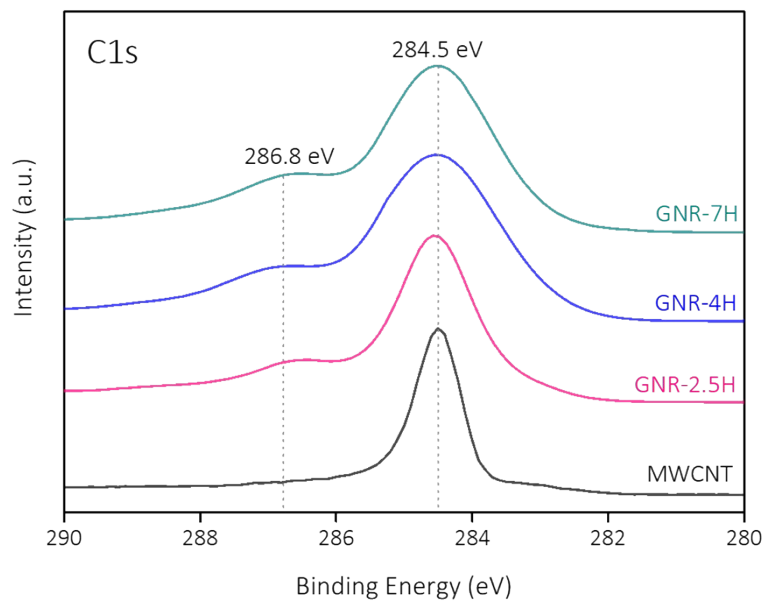

**Figure S7.** High resolution XPS for C1s spectra of the as-prepared concentrated sulfuric acid (18 M H<sub>2</sub>SO<sub>4</sub>) products.

The calculation of GIC stages for the galvanostatic charging curve in concentrated sulfuric acid

GIC consists of intercalant atomic or molecular layers inserted between graphene layers. The stage index  $n$  of graphite intercalation compounds is classified as  $n$  graphene layers separating successive intercalate layers. The chemical formula for GIC is  $C_p^+ \cdot HSO_4^- \cdot H_2SO_4$  where the value of  $p$  is a measure of the charged carbon. To add, the phase range of  $p$  is related to the electrochemical charge ( $Q$ ) and the mass loading ( $M$ ) of the working electrode. For example,  $p > 21$  is defined as stage index  $n$  (stage-1 GIC:  $C_{21-28}^+ \cdot HSO_4^- \cdot H_2SO_4$ ). Based on an electrochemical intercalation reaction, the value of  $p$  can be calculated according to the following equation S2:  $p = e \times M/m_a \times Q$ , where  $e$  (C) is the electric charge,  $M$  is the mass loading of the working electrode and  $m_a$  (g) is the atomic mass of carbon ( $e/m_a = 8041 \text{ C g}^{-1}$ ).<sup>[S1]</sup>

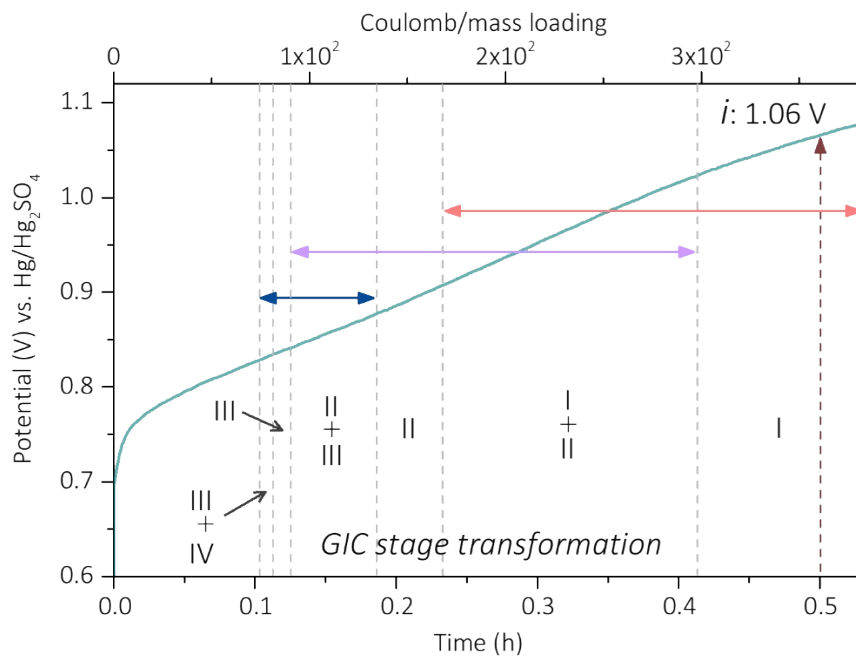

**Figure S8.** Cell potential (V) versus Time (h) and Coulomb/mass loading (The dashed lines indicating the GIC stage steps is calculated for the equation S2).

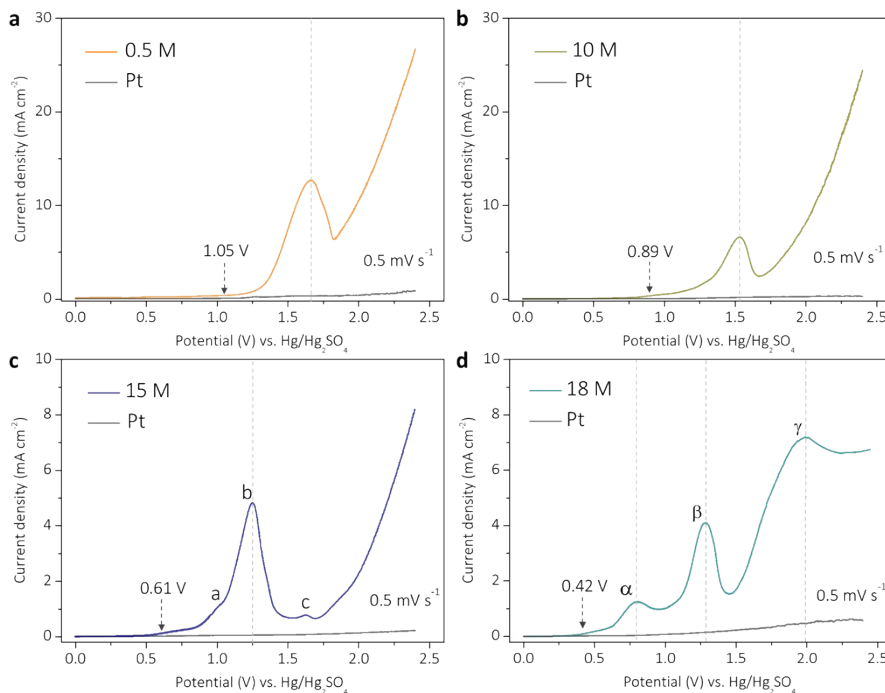

**Figure S9.** Linear sweep voltammetry (LSV) curves of dilute  $\text{H}_2\text{SO}_4$  electrolytes in the three-electrode cell at a scan rate of  $0.5 \text{ mV s}^{-1}$ : (a)  $0.5 \text{ M H}_2\text{SO}_4$ , (b)  $10 \text{ M H}_2\text{SO}_4$ , (c)  $15 \text{ M H}_2\text{SO}_4$ , and (d)  $18 \text{ M H}_2\text{SO}_4$ . LSV curves of Pt (dotted line) were performed as a working electrode without MWCNT in the same electrochemical condition. In Figure S7a, a peak with a dashed line at  $\sim 1.66 \text{ V}$  is corresponding to the surface oxidation and no other peak is shown. A first peak at  $\sim 0.89 \text{ V}$  in Figure S7b is probably related to the intercalation of graphene layers with the co-intercalated water molecule. A second peak at  $\sim 1.53 \text{ V}$  may refer to the formation of C-OH groups and further oxidation to carbonyls groups.<sup>[S2]</sup> LSV curves in Figure S7c and d, peak “a” at  $\sim 1.01 \text{ V}$  and peak “ $\alpha$ ” at  $\sim 0.8 \text{ V}$  show the electrochemical formation of the stage-1 GIC. The second peak “b” at  $\sim 1.25 \text{ V}$  and “ $\beta$ ” at  $\sim 1.28 \text{ V}$  is probably due to the peroxidation of bisulfate anion.<sup>[S3]</sup> However, “c” peak at  $\sim 1.63 \text{ V}$  and “ $\gamma$ ” peak at  $\sim 1.99 \text{ V}$  differ in the shapes, which may be due to the concentration of water in each  $\text{H}_2\text{SO}_4$  electrolyte during the overoxidation reaction. All LSV curves show water decomposition in  $\text{H}_2\text{SO}_4$  electrolytes when the potential becomes  $2 \text{ V}$  (V vs.  $\text{Hg}/\text{Hg}_2\text{SO}_4$ ).



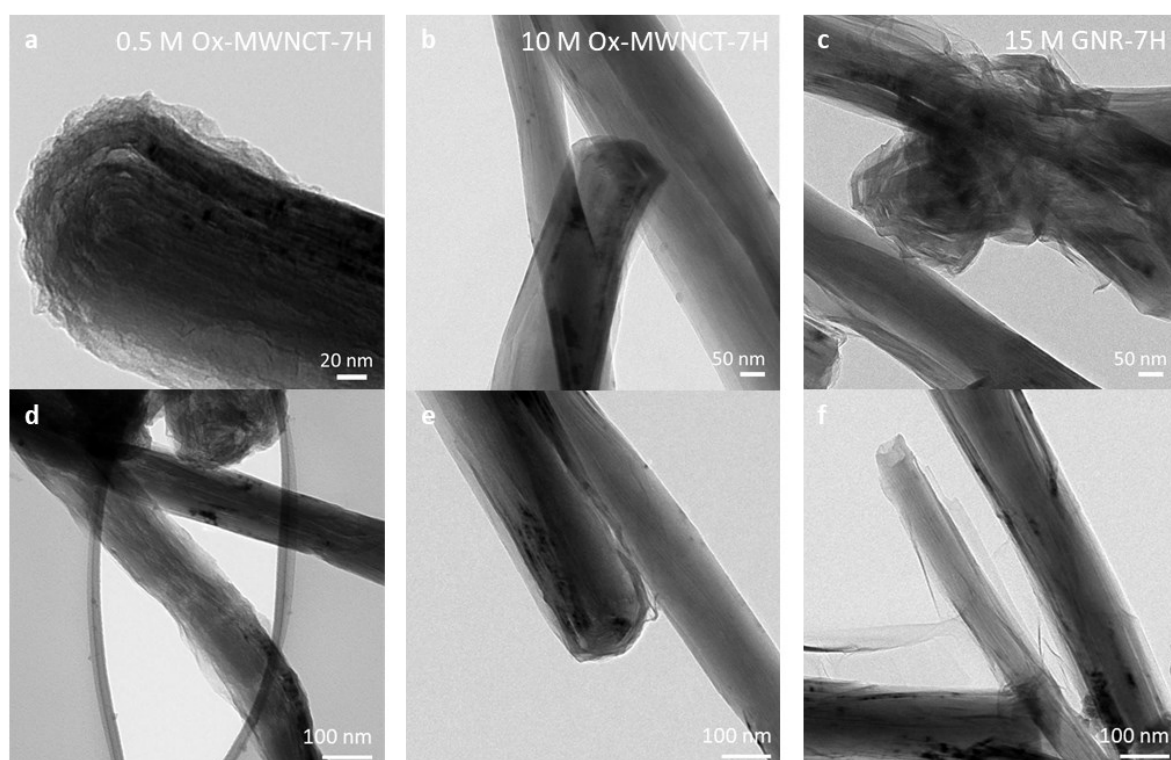

**Figure S10.** TEM images of the as-prepared products with caps; (a, d) 0.5 M Ox-MWNCT-7H, (b, e) 10 M Ox-MWNCT-7H, and (c, f) 15 M GNR-7H.

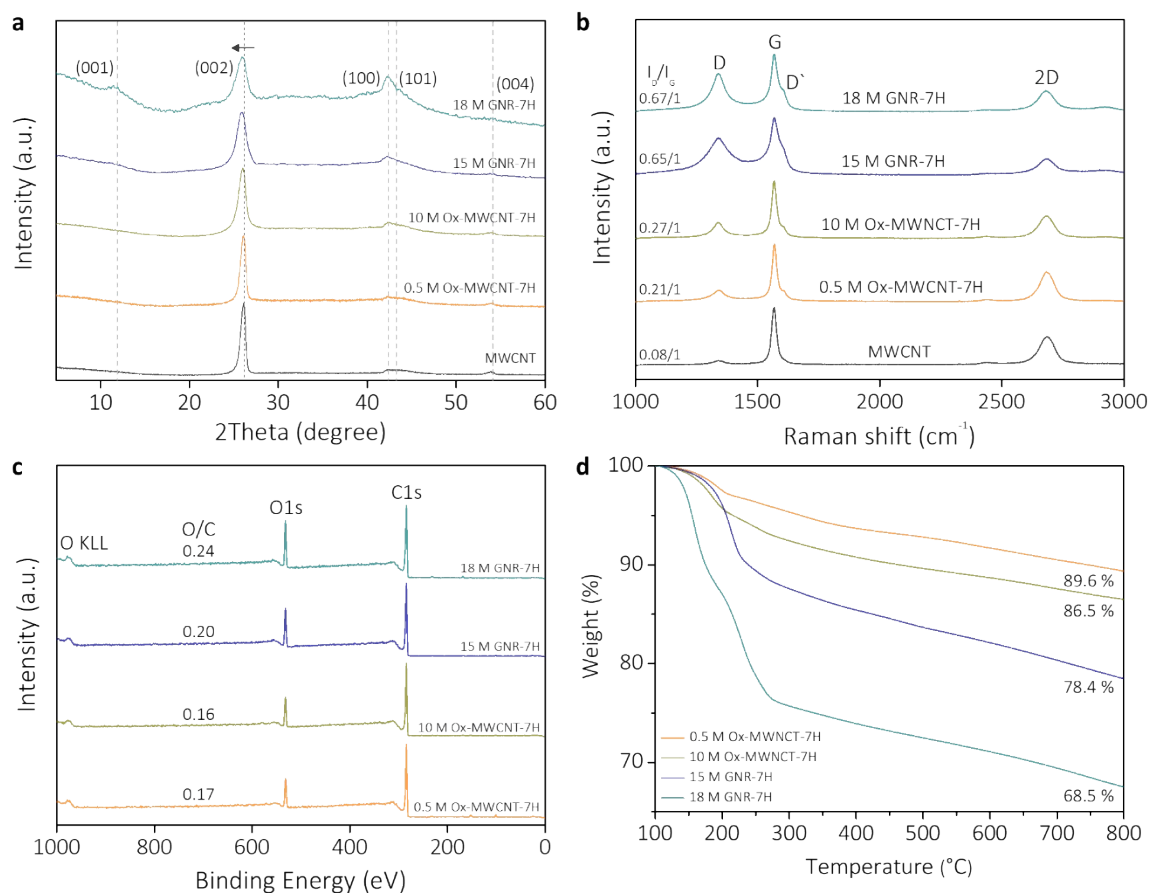

**Figure S11.** Characterization of the products obtained by electrochemical reactions at different concentrations of  $\text{H}_2\text{SO}_4$ . (a) X-ray diffraction, (b) Raman spectra, (c) XPS spectra, and (d) TGA with a ramping rate of  $10\text{ }^{\circ}\text{C min}^{-1}$  in  $\text{N}_2$ .



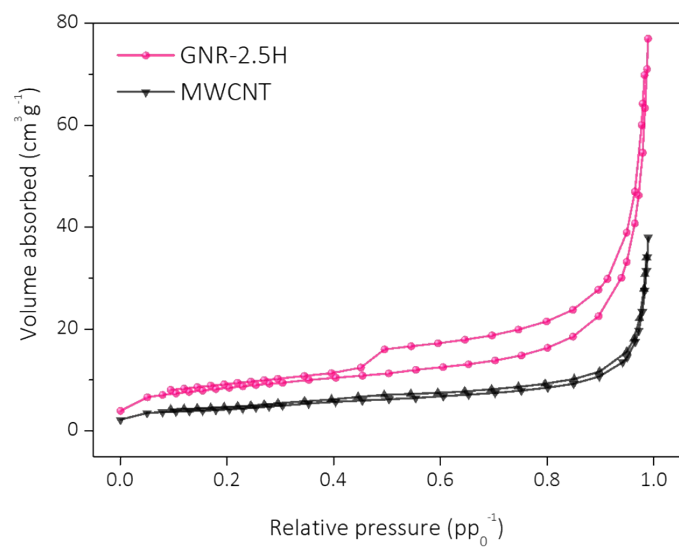

**Figure S12.** Brunauer–Emmett–Teller (BET) surface areas of MWCNT and GNR-2.5H.

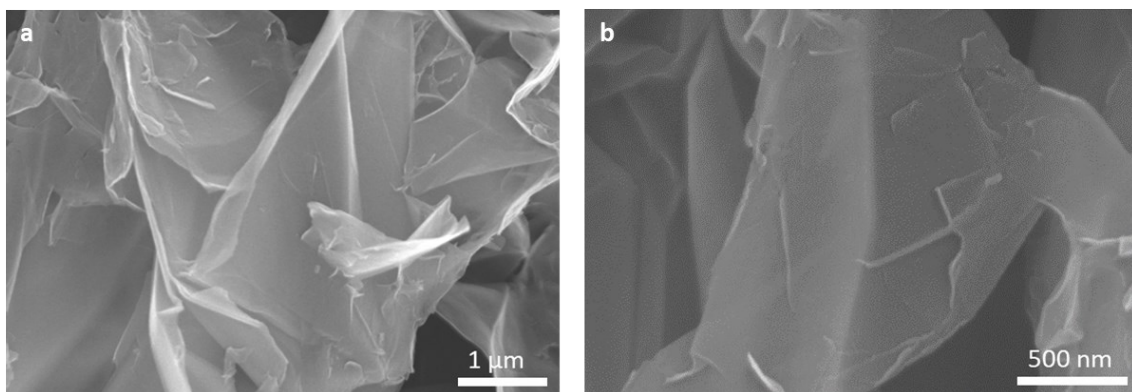

**Figure S13.** SEM images of the electrochemically exfoliated graphene (EEG); (a) Low and (b) High magnification.

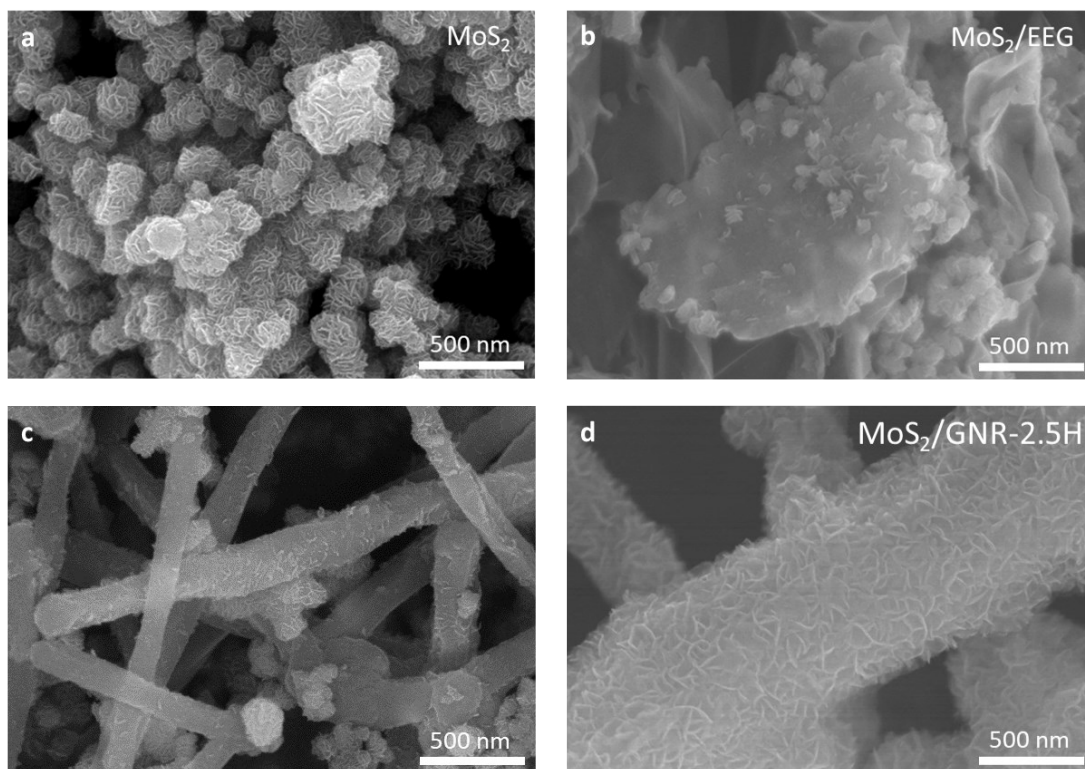

**Figure S14.** SEM images of (a) MoS<sub>2</sub>, (b) MoS<sub>2</sub>/EEG, (c) MoS<sub>2</sub>/MWCNT, and (d) MoS<sub>2</sub>/GNR-2.5H.

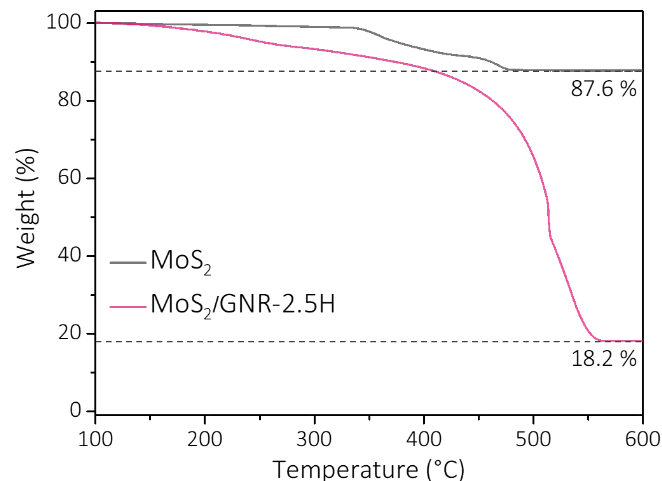

**Figure S15.** TGA curves of MoS<sub>2</sub> and MoS<sub>2</sub>/GNR-2.5H in air. To determine Mo content in the MoS<sub>2</sub>/GNR-2.5H, thermogravimetric analysis (TGA) and inductively coupled plasma atomic emission spectroscopy (ICP-AES) analysis were conducted. Concerning TGA results, the remaining mass percentage is 87.6% and 18.2% for MoS<sub>2</sub> and MoS<sub>2</sub>/GNR-2.5H, respectively. Assuming a complete conversion of MoS<sub>2</sub> to MoO<sub>3</sub> and that of C to CO<sub>2</sub>, it can be calculated that the mass percentage of Mo in these two products is 58.4% and 12.1%, respectively. Also, ICP-AES of the MoS<sub>2</sub>/GNR-2.5H confirms that the mass percentage of Mo is 11%, which is close to the result of TGA analysis.

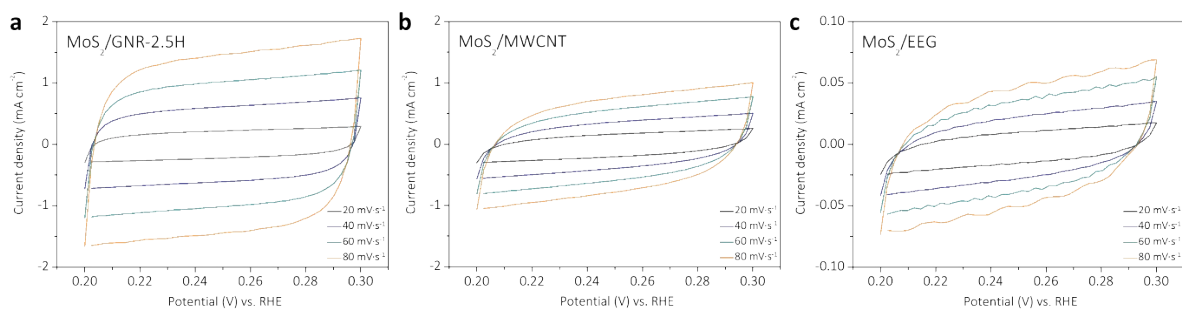

**Figure S16.** Cyclic voltammograms (CV) of (a) MoS<sub>2</sub>/GNR-2.5H, (b) MoS<sub>2</sub>/MWCNT, and (c) MoS<sub>2</sub>/EEG recorded at scan rates of 20 to 80 mV s<sup>-1</sup>.

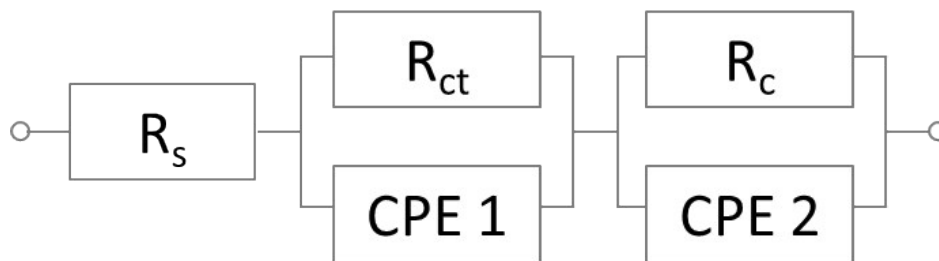

$R_s$  = The series of electrolyte and contact resistance

$R_{ct}$  = Charge-transfer resistance at the catalyst/solution interface

$R_c$  = The resistance arises from solid/electrolyte interface

**Figure S17.** Two CPE (constant phase element) equivalent circuit elements for the as-prepared catalysts.

**Table S1.** Comparison of electrochemical synthesis for unzipping the single or multi-walled carbon nanotube.

| Types of CNT                                    | Mechanism                                   | Working electrode                                                             | Reagents                             | Scalability<br>(mass loading) | Ref                  |
|-------------------------------------------------|---------------------------------------------|-------------------------------------------------------------------------------|--------------------------------------|-------------------------------|----------------------|
| Single or<br>Multi-walled<br>carbon<br>nanotube | Oxidative<br>cleavage of the<br>C-C bond    | GCE <sup>a)</sup><br>(Drop casting)                                           | 0.5 M H <sub>2</sub> SO <sub>4</sub> | Difficult<br>(2.5 μg)         | [S4]                 |
| Multi-walled<br>carbon<br>nanotube              | Hetero atom<br>dopant-specific<br>unzipping | GCE <sup>a)</sup><br>(CNT forest on Si/SiO <sub>2</sub><br>wafer transferred) | 1 M H <sub>2</sub> SO <sub>4</sub>   | Difficult<br>(Not mentioned)  | [S5]                 |
| Single-walled<br>carbon<br>nanotube             | Oxidative<br>cleavage of the<br>C-C bond    | GCE <sup>a)</sup><br>(Drop casting)                                           | 0.5 M H <sub>2</sub> SO <sub>4</sub> | Difficult<br>(2.5 μg)         | [S6]                 |
| Multi-walled<br>carbon<br>nanotube              | Dopant-specific<br>unzipping                | GCE <sup>a)</sup><br>(CNT forest on Si/SiO <sub>2</sub><br>wafer transferred) | 1 M H <sub>2</sub> SO <sub>4</sub>   | Difficult<br>(Not mentioned)  | [S7]                 |
| Single-walled<br>carbon<br>nanotube             | Oxidative<br>cleavage of the<br>C-C bond    | GCE <sup>a)</sup><br>(Drop casting)                                           | 0.5 M H <sub>2</sub> SO <sub>4</sub> | Difficult<br>(5 μg)           | [S8]                 |
| Multi-walled<br>carbon<br>nanotube              | Intercalation                               | MWCNT powder on<br>membrane                                                   | 18 M H <sub>2</sub> SO <sub>4</sub>  | Good<br>(50 mg)               | <b>This<br/>work</b> |

<sup>a)</sup>(GCE; Glassy carbon electrode.)

**Table S2.** The concentration of Fe element is determined by ICP-MS measurement. Samples for ICP-MS analysis were prepared according to the following procedure. To obtain sample 1, 15 mg of the MWCNT powder was dispersed in concentrated sulfuric acid (30 mL) for 2 days and the mixture was separated from the solution by centrifugation (10 min at 6000 rpm). Then, the supernatant was diluted by deionized water (v/v = 1:100). For comparison, sample 2 was prepared by galvanostatic charging at a current density 0.5 mA cm<sup>-2</sup> for 0.5 h using a three-electrode cell. The rest of the procedures was the same as described above.

| Sample                           | Fe<br>[ppb; $\mu\text{g kg}^{-1}$ ] |
|----------------------------------|-------------------------------------|
| 1. MWCNT: 2 days                 | 6.8                                 |
| 2. MWNCT: charge state- <i>i</i> | 10.9                                |

**Table S3.** The full width at half maximum (FWHM) of the pristine MWNCT and all products was evaluated from the width of (002) peak using MDI Jade 6 software for multiple Gaussian function. A wider value of FWHM ( $B_{\text{size}}$ , °) indicates that the oxidation of MWCNT decreased the degree of crystallinity.

| Sample                      | FWHM $B_{\text{size}}$ [°] |
|-----------------------------|----------------------------|
| 1. MWCNT                    | 0.68                       |
| 2. unzipped MWCNT- <i>i</i> | 1.14                       |
| 3. GNR-2.5H                 | 1.29                       |
| 4. GNR-4H                   | 1.41                       |
| 5. GNR-7H                   | 1.53                       |



**Table S4.** The sheet resistance of the samples was investigated by a four-point probe measurement. This shows that the level of oxidation affects the conductivity of products.

| Sample           | Sheet resistance [ $\Omega \text{ sq}^{-1}$ ] |
|------------------|-----------------------------------------------|
| 1. MWCNT film    | 18.19                                         |
| 2. GNR-2.5H film | 35.46                                         |

**Table S5.** Comparison of reported experimental methods with our electrochemical intercalation synthesis.

| Types of CNT                                   | Mechanism                  | Reagents                                                                              | Synthesis method                                  | Explosive /Toxicity | Ref   |
|------------------------------------------------|----------------------------|---------------------------------------------------------------------------------------|---------------------------------------------------|---------------------|-------|
| Multi-walled carbon nanotube                   | Edge-selective oxidation   | HNO <sub>3</sub> vapor                                                                | Hydrothermal for HNO <sub>3</sub> vapor splitting | Both                | [S9]  |
| Single-walled or Multi-walled carbon nanotubes | Fluorination of CNT        | EMIM BF <sub>4</sub> ionic liquid                                                     | Microwave irradiation                             | Toxic               | [S10] |
| Multi-walled carbon nanotube                   | Microwave interaction      | H <sub>2</sub> SO <sub>4</sub> , H <sub>3</sub> PO <sub>4</sub> and KMnO <sub>4</sub> | Microwave irradiation                             | Both                | [S11] |
| Multi-walled carbon nanotube                   | Atomic H-induced unzipping | Mixture of H <sub>2</sub> , H <sub>2</sub> O, CH <sub>4</sub> gas                     | Heat treatment at 850 °C                          | Explosive           | [S12] |
| Multi-walled carbon nanotube                   | Surface oxidation          | PmPV and DEC                                                                          | Sonication with pre-treated MWCNT                 | None                | [S13] |

|                                    |                          |                                                                             |                                     |           |                      |
|------------------------------------|--------------------------|-----------------------------------------------------------------------------|-------------------------------------|-----------|----------------------|
| Multi-walled<br>carbon<br>nanotube | Mechano-<br>chemical     | -                                                                           | Grinding with pre-<br>treated MWCNT | None      | [S14]                |
| Multi-walled<br>carbon<br>nanotube | Intercalation            | KMnO <sub>4</sub> and<br>H <sub>2</sub> SO <sub>4</sub>                     | Solution reaction                   | Both      | [S15]                |
| Multi-walled<br>carbon<br>nanotube | Intercalation            | KMnO <sub>4</sub> , NaNO <sub>3</sub><br>and H <sub>2</sub> SO <sub>4</sub> | Solution reaction                   | Both      | [S16]                |
| Multi-walled<br>carbon<br>nanotube | Intercalation            | LiAlH <sub>4</sub> and liquid<br>NH <sub>3</sub>                            | Solution reaction                   | Explosive | [S17]                |
| Multi-walled<br>carbon<br>nanotube | Electrical break<br>down | -                                                                           | Electrical bias                     | None      | [S18]                |
| Multi-walled<br>carbon<br>nanotube | Intercalation            | Potassium vapor                                                             | Heat treatment at 250<br>°C         | Explosive | [S19]                |
| Multi-walled<br>carbon<br>nanotube | Intercalation            | 18 M H <sub>2</sub> SO <sub>4</sub><br>(no oxidizing<br>agents)             | Electrochemical<br>reaction         | None      | <b>This<br/>work</b> |

## References

- [S1] P. C. Eklund, C. H. Olk, F. J. Holler, J. G. Spolar and E. T. Arakawa, *J. Mater. Res.*, 1986, **1**, 361–367.
- [S2] F. Beck, J. Jiang and H. Krohn, *J. Electroanal. Chem.*, 1995, **389**, 161–165.
- [S3] A. Metrot and J. E. Fischer, *Synth. Met.*, 1981, **3**, 201–207.
- [S4] D. B. Shinde, J. Debgupta, A. Kushwaha, M. Aslam and V. K. Pillai, *J. Am. Chem. Soc.*, 2011, **133**, 4168–4171.
- [S5] S. P. Sasikala, T. Yun, D. S. Choi and M. S. Jeong, *ACS Appl. Mater. Interfaces*, 2019, **11**, 41, 38006–38015.
- [S6] J. Debgupta, D. B. Shinde and V. K. Pillai, *Chem. Commun.*, 2012, **48**, 3088–3090.
- [S7] J. Lim, U. N. Maiti, N. Y. Kim, R. Narayan, W. J. Lee, D. S. Choi, Y. Oh, J. M. Lee, G. Y. Lee, S. H. Kang, H. Kim, Y. H. Kim and S. O. Kim, *Nat. Commun.*, 2016, **7**, 1–9.
- [S8] R. John, D. B. Shinde, L. Liu, F. Ding, Z. Xu, C. Vijayan, V. K. Pillai and T. Pradeep, *ACS Nano*, 2014, **8**, 234–242.
- [S9] M. Yang, L. Hu, X. Tang, H. Zhang, H. Zhu, T. Fan and D. Zhang, *Carbon*, 2016, **110**, 480–489.
- [S10] S. Vadahanambi, J. H. Jung, R. Kumar, H. J. Kim and I. K. Oh, *Carbon*, 2013, **53**, 391–398.
- [S11] C. L. Sun, C. T. Chang, H. H. Lee, J. Zhou, J. Wang, T. K. Sham and W. F. Pong, *ACS Nano*, 2011, **5**, 7788–7795.
- [S12] X. Fan, Z. Peng, Y. Yang, H. Zhou and X. Guo, *J. Mater. Chem. A*, 2015, **3**, 10077–10084.
- [S13] L. Jiao, X. Wang, G. Diankov, H. Wang and H. Dai, *Nat. Nanotechnol.*, 2010, **5**, 321–325.
- [S14] M. A. Kabbani, C. S. Tiwary, P. A. S. Autreto, G. Brunetto, A. Som, K. R. Krishnadas, S. Ozden, K. P. Hackenberg, Y. Gong, D. S. Galvao, R. Vajtai, A. T. Kabbani, T. Pradeep and P. M. Ajayan, *Nat. Commun.*, 2015, **6**, 1–8.
- [S15] D. V. Kosynkin, A. L. Higginbotham, A. Sinitskii, J. R. Lomeda, A. Dimiev, B. K. Price and J. M. Tour, *Nature*, 2009, **458**, 872–876.
- [S16] B. Xiao, X. Li, X. Li, B. Wang, C. Langford, R. Li and X. Sun, *J. Phys. Chem. C*, 2014, **118**, 881–890.
- [S17] A. G. Cano-Márquez, F. J. Rodríguez-Macías, J. Campos-Delgado, C. G. Espinosa-González, F. Tristán-López, D. Ramírez-González, D. A. Cullen, D. J. Smith, M. Terrones and Y. I. Vega-Cantú, *Nano Lett.*, 2009, **9**, 1527–1533.
- [S18] K. Kim, A. Sussman and A. Zettl, *ACS Nano*, 2010, **4**, 1362–1366.
- [S19] D. V. Kosynkin, W. Lu, A. Sinitskii, G. Pera, Z. Sun and J. M. Tour, *ACS Nano*, 2011, **5**, 968–974.
